# Supplementary material for: Macaronesia Acts as a Museum of Genetic Diversity of Relict Ferns: The Case of Diplazium caudatum (Athyriaceae)
Source: MDPI journal article supplement (doi:10.3390/plants10112425), 2021-11-10
Supplement: s1 [file s1]

Supporting information

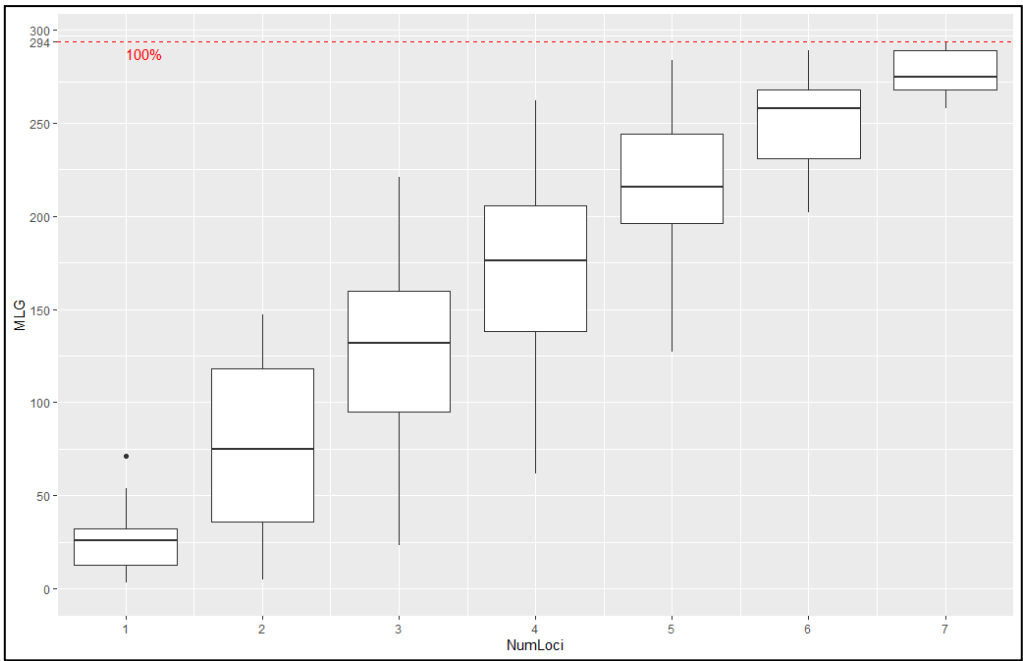

**Figure S1.** Genotypic accumulation curve showing the resolving power of the eight microsatellite used in this study.

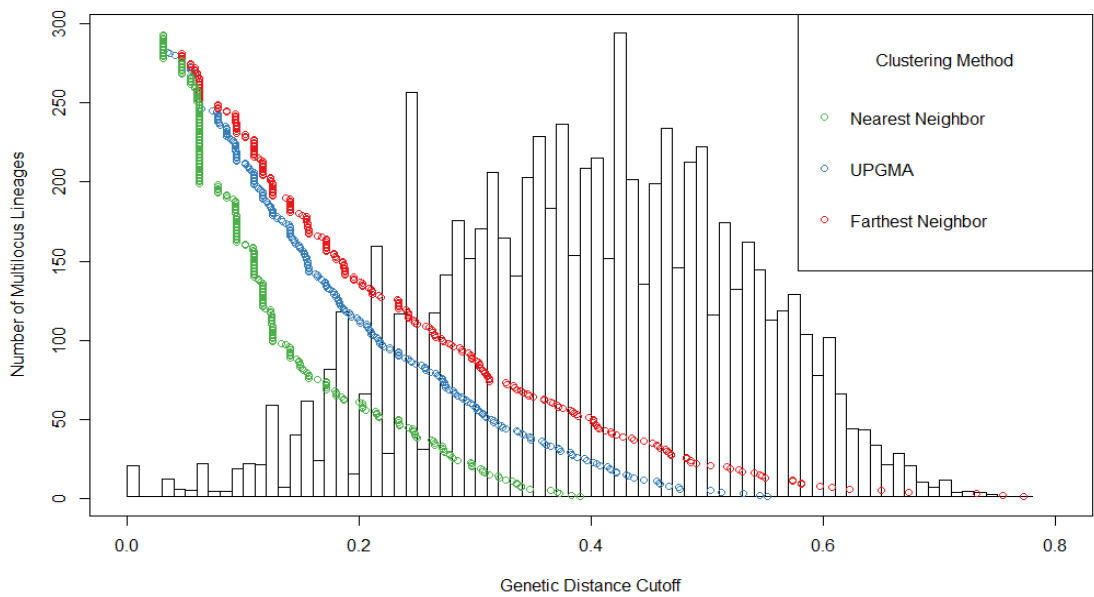

**Figure S2.** Histogram of frequency distribution of pairwise genetic distances. The genetic threshold distances (for the three methods implemented in POPPR) under which two MLGs are considered the same MLL are showed.

a)

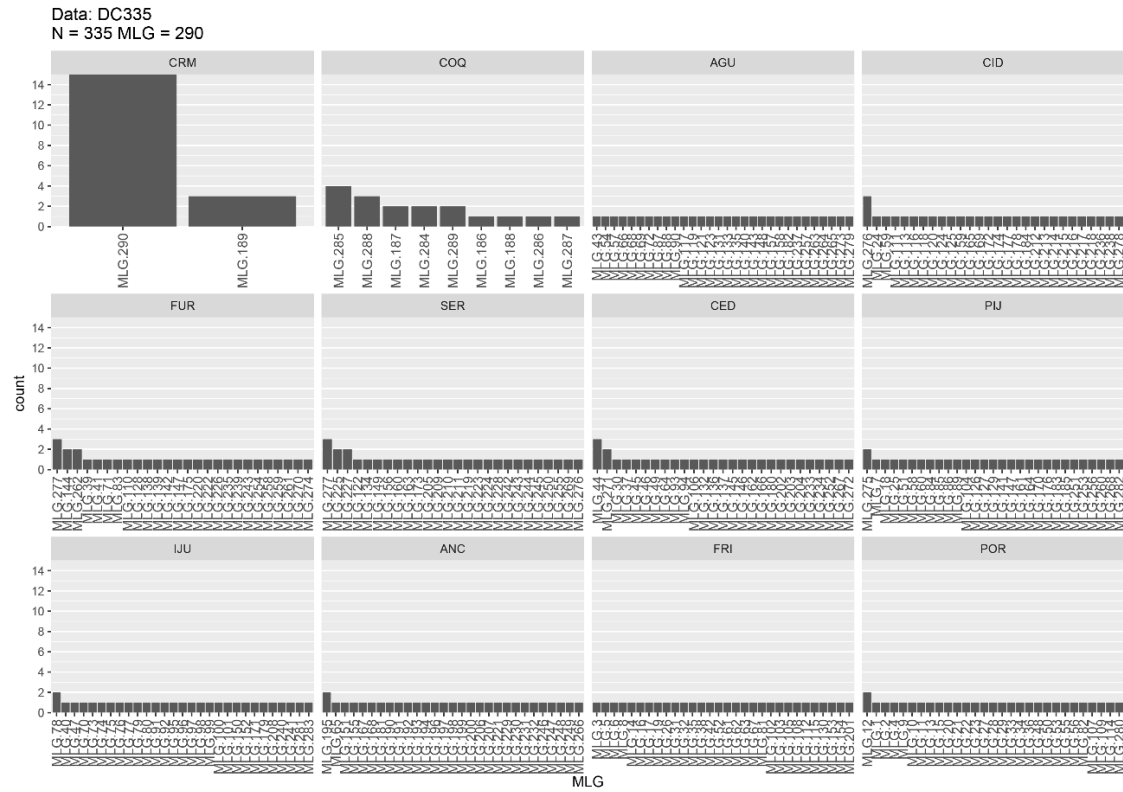

b)

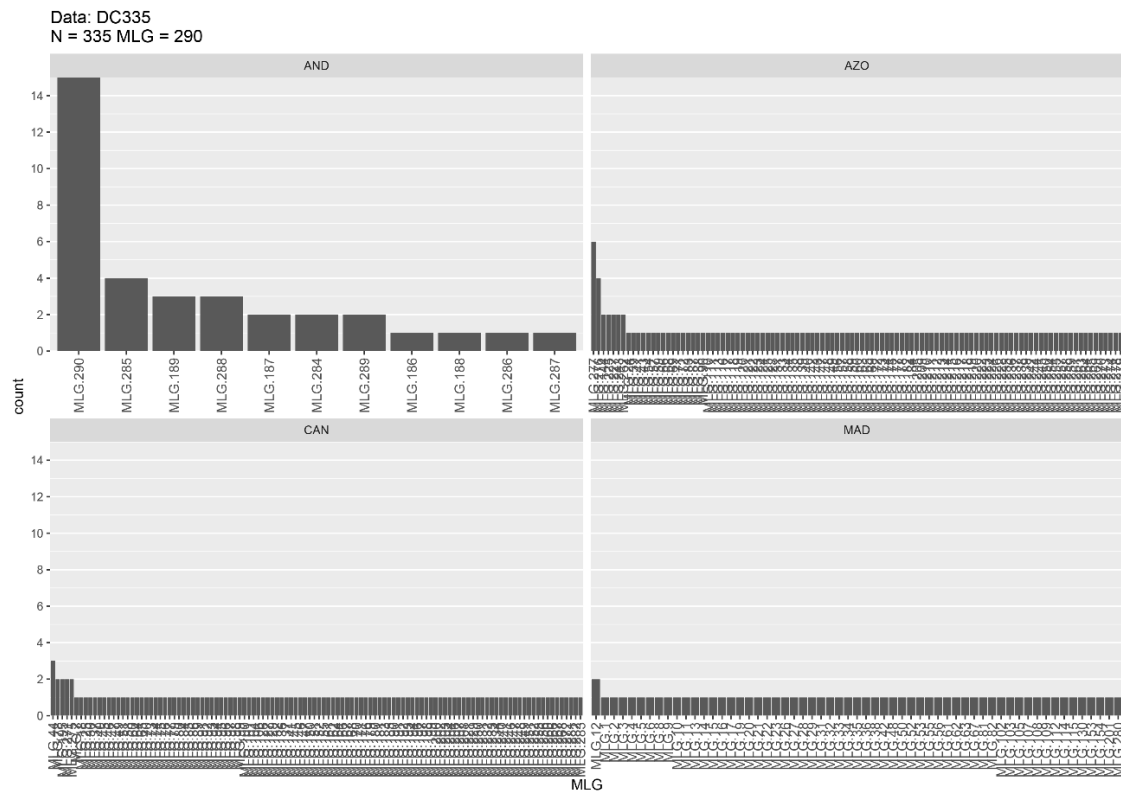

**Figure S3.** Distribution of the 290 MLLs among the 294 individuals (genets) of *D. caudatum*. Across the 12 populations (a) and across the 4 geographical regions (b).

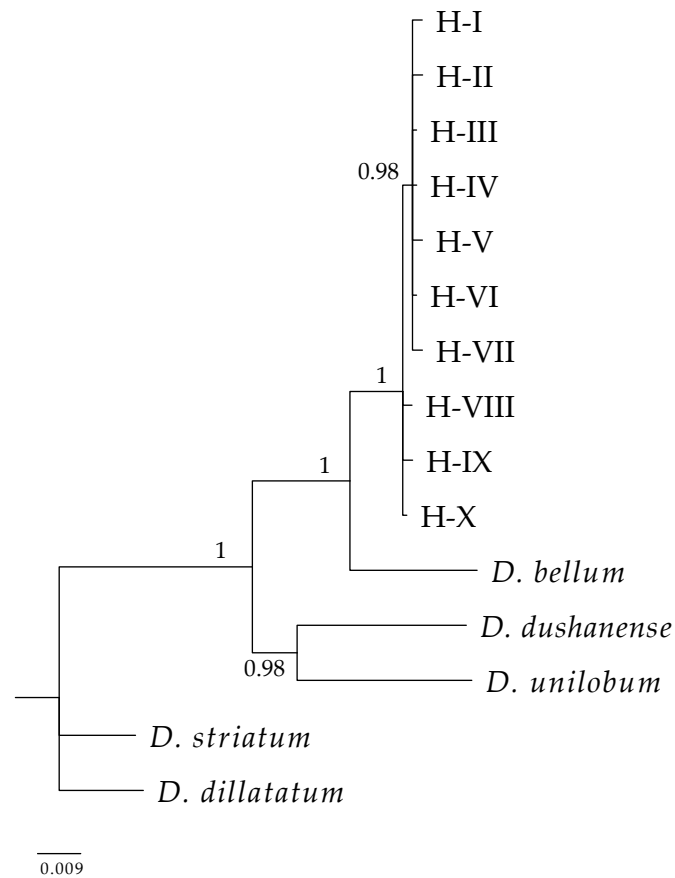

**Figure S4.** 50% majority-rule consensus tree obtained from the Bayesian inference with MrBAYES of the *trnS-trnG* ptDNA region of *D. caudatum* and outgroup species. Haplotypes are denoted with Roman numerals; numbers above branches are Bayesian posterior probabilities.

**Table S1.** Characteristics of 8 developed microsatellite loci.

| Locus   | Primer sequences (5'–3') <sup>a</sup>                  | Repeat motif | Allele size range (bp) | T <sub>a</sub> (°C) <sup>b</sup> | GenBank accession no. |
|---------|--------------------------------------------------------|--------------|------------------------|----------------------------------|-----------------------|
| DC-27   | F: AGCAGAGGAGCAGTGGAA<br>R: TCTTGAGCGAGTAGAGGTAA       | (GA)23       | 172-192                | 52                               | OL311506              |
| DC-66A  | F: TCTCGCAAACAATCAGTAAA<br>R: GGTGTGTGTTGCAGGAAAT      | [A(C/G)]21   | 252                    | 52                               | OL311507              |
| DC-77   | F: CTAAGTGAAGCGAGATAAG<br>R: CGCGAAACAGGGCAAGAG        | (AG)25       | 184-250                | 52                               | OL311508              |
| DC-AT12 | F: CATCTTTTCATGGGTACAAG<br>R: GGATAGATCACTGCACATTG     | (CT)15       | 156-170                | 52                               | OL311510              |
| DC-AT17 | F: AAAAGCCTAGATTTCTCAT<br>R: TTATGCAAATCAGGTTTAT       | (GA)18       | 207-285                | 48                               | OL311511              |
| DC-AT30 | F: TCGCCCGATGTTGTGTAATT<br>R: GTTTACGAACCTGTAGCCATCAGT | (GT)12       | 320-324                | 58                               | OL311513              |
| DC-AT2  | F: TGTCCCTTATCATTGCACAGG<br>R: GGACTACTCCCACGATGTCA    | (GA)22       | 148-182                | 60                               | OL311509              |
| DC-AT22 | F: AGAGGGTGAGTCAGTGGAA<br>R: ATATGGTGATTTAGATAGGCCAG   | (GA)23       | 286-328                | 58                               | OL311512              |

Note: T<sub>a</sub> = annealing temperature.

<sup>a</sup> Forward primer sequence and allele size range do not include the M13-tail sequence (5'-CACGACGTTGTAAAACGAC-3').

<sup>b</sup> Cycling parameters: 94°C 3min, followed by 35 cycles of 94°C 30 s, T<sub>a</sub> 30 s, and 72°C 30 s; and a final extension at 72°C 10 min. PCR reactions: 10-μL containing 20 ng of genomic DNA, 0.02 μM of the M13-labeled forward primer, 0.45 μM of each reverse primer and fluorolabeled M13 primer (5'-6FAM, 5'-HEX, 5'-ATTO-550), 5 μL Kapa 2G Robust HotStart ReadyMix (Kapa Biosystems, Boston, MA).

**Table S2.** Percent contribution and permutation importance (MaxEnt) of selected model.

Variables in bold were selected for the final model.

| Variable                                 | MaxEnt               | MaxEnt                 |
|------------------------------------------|----------------------|------------------------|
|                                          | Percent contribution | Permutation importance |
| <b>Mean Diurnal Range</b>                | <b>52.5</b>          | <b>26.2</b>            |
| <b>Min. Temperature of Coldest Month</b> | <b>24.1</b>          | <b>70.3</b>            |
| Precipitation of Warmest Quarter         | 16.7                 | 3.2                    |
| Type of Soil                             | 2.5                  | 0.1                    |
| Precipitation of Driest Month            | 1.9                  | 0.0                    |
| Precipitation Seasonality                | 1.8                  | 0.0                    |
| Precipitation of Coldest Quarter         | 0.3                  | 0.1                    |
| Max. Temperature of Warmest Month        | 0.2                  | 0.1                    |
| Precipitation of Wettest Month           | 0.1                  | 0.0                    |

**Table S3.** Pairwise population  $F_{ST}$  for microsatellites.  $F_{ST}$  values obtained with all sampled individuals are represented below the principal diagonal, and those obtained with a single representing MLL per population above the principal diagonal. Values in bold were significant at the 5% nominal level after sequential Bonferroni correction.

|     | CRM          | COQ          | AGU          | CID          | FUR          | SER          | CED          | PIJ          | IJU          | ANC          | FRI          | POR          |
|-----|--------------|--------------|--------------|--------------|--------------|--------------|--------------|--------------|--------------|--------------|--------------|--------------|
| CRM | --           | 0.306        | 0.504        | 0.544        | 0.540        | 0.503        | 0.566        | 0.481        | 0.566        | 0.506        | 0.317        | 0.310        |
| COQ | <b>0.586</b> | --           | <b>0.295</b> | <b>0.328</b> | <b>0.338</b> | <b>0.283</b> | <b>0.373</b> | <b>0.304</b> | <b>0.350</b> | <b>0.378</b> | <b>0.284</b> | <b>0.314</b> |
| AGU | <b>0.631</b> | <b>0.315</b> | --           | <b>0.086</b> | <b>0.075</b> | <b>0.081</b> | <b>0.111</b> | <b>0.058</b> | <b>0.163</b> | <b>0.263</b> | <b>0.166</b> | <b>0.224</b> |
| CID | <b>0.667</b> | <b>0.353</b> | <b>0.089</b> | --           | <b>0.056</b> | <b>0.072</b> | <b>0.123</b> | <b>0.110</b> | <b>0.194</b> | <b>0.292</b> | <b>0.183</b> | <b>0.237</b> |
| FUR | <b>0.675</b> | <b>0.364</b> | <b>0.071</b> | <b>0.057</b> | --           | 0.049        | <b>0.099</b> | <b>0.082</b> | <b>0.188</b> | <b>0.273</b> | <b>0.176</b> | <b>0.228</b> |
| SER | <b>0.653</b> | <b>0.314</b> | <b>0.088</b> | <b>0.082</b> | 0.058        | --           | <b>0.121</b> | <b>0.123</b> | <b>0.197</b> | <b>0.225</b> | <b>0.199</b> | <b>0.246</b> |
| CED | <b>0.674</b> | <b>0.385</b> | <b>0.102</b> | <b>0.126</b> | <b>0.098</b> | <b>0.123</b> | --           | <b>0.142</b> | <b>0.180</b> | <b>0.336</b> | <b>0.178</b> | <b>0.244</b> |
| PIJ | <b>0.616</b> | <b>0.325</b> | <b>0.057</b> | <b>0.108</b> | <b>0.075</b> | <b>0.131</b> | <b>0.138</b> | --           | <b>0.170</b> | <b>0.247</b> | <b>0.156</b> | <b>0.199</b> |
| IJU | <b>0.685</b> | <b>0.374</b> | <b>0.169</b> | <b>0.209</b> | <b>0.204</b> | <b>0.220</b> | <b>0.178</b> | <b>0.180</b> | --           | <b>0.330</b> | <b>0.175</b> | <b>0.223</b> |
| ANC | <b>0.635</b> | <b>0.399</b> | <b>0.268</b> | <b>0.301</b> | <b>0.279</b> | <b>0.240</b> | <b>0.334</b> | <b>0.254</b> | <b>0.341</b> | --           | <b>0.266</b> | <b>0.288</b> |
| FRI | <b>0.478</b> | <b>0.317</b> | <b>0.166</b> | <b>0.195</b> | <b>0.192</b> | <b>0.222</b> | <b>0.175</b> | <b>0.160</b> | <b>0.179</b> | <b>0.270</b> | --           | <b>0.027</b> |
| POR | <b>0.477</b> | <b>0.349</b> | <b>0.225</b> | <b>0.251</b> | <b>0.248</b> | <b>0.273</b> | <b>0.244</b> | <b>0.206</b> | <b>0.228</b> | <b>0.287</b> | <b>0.029</b> | --           |

**Table S4.** Mean recent migration rates ( $m$ ) among the studied populations, estimated from eight microsatellite loci using the BAYESASS program. Values on the diagonal (underlined) indicate the proportion of individuals in each generation that are not migrants. Values in bold are the  $m$  rates that are informative.

| From<br>To | CRM                     | COG                     | AGU                     | CID                     | FUR                     | SER                     | CED                     | PIJ                     | IJU                     | ANC                     | FRI                     | POR                     |
|------------|-------------------------|-------------------------|-------------------------|-------------------------|-------------------------|-------------------------|-------------------------|-------------------------|-------------------------|-------------------------|-------------------------|-------------------------|
| CRM        | <u>0.689</u><br>(0.021) | 0.085<br>(0.037)        | 0.023<br>(0.021)        | 0.021<br>(0.020)        | 0.022<br>(0.021)        | 0.022<br>(0.020)        | 0.024<br>(0.024)        | 0.021<br>(0.019)        | 0.022<br>(0.021)        | 0.022<br>(0.021)        | 0.022<br>(0.021)        | 0.022<br>(0.02)         |
| COQ        | 0.016<br>(0.016)        | <u>0.791</u><br>(0.049) | 0.037<br>(0.027)        | 0.015<br>(0.014)        | 0.016<br>(0.016)        | 0.014<br>(0.014)        | 0.028<br>(0.038)        | 0.016<br>(0.015)        | 0.015<br>(0.015)        | 0.016<br>(0.016)        | 0.016<br>(0.015)        | 0.015<br>(0.014)        |
| AGU        | 0.008<br>(0.007)        | 0.008<br>(0.008)        | <u>0.909</u><br>(0.023) | 0.008<br>(0.008)        | 0.007<br>(0.007)        | 0.008<br>(0.007)        | 0.010<br>(0.010)        | 0.007<br>(0.007)        | 0.008<br>(0.008)        | 0.008<br>(0.007)        | 0.008<br>(0.008)        | 0.008<br>(0.007)        |
| CID        | 0.008<br>(0.008)        | 0.008<br>(0.008)        | <b>0.243</b><br>(0.022) | <u>0.674</u><br>(0.008) | 0.008<br>(0.008)        | 0.008<br>(0.007)        | 0.008<br>(0.007)        | 0.007<br>(0.007)        | 0.008<br>(0.008)        | 0.008<br>(0.007)        | 0.008<br>(0.007)        | 0.008<br>(0.007)        |
| FUR        | 0.009<br>(0.008)        | 0.009<br>(0.009)        | <b>0.224</b><br>(0.025) | 0.008<br>(0.008)        | <u>0.675</u><br>(0.008) | 0.008<br>(0.008)        | 0.013<br>(0.012)        | 0.009<br>(0.008)        | 0.008<br>(0.008)        | 0.015<br>(0.012)        | 0.008<br>(0.008)        | 0.008<br>(0.008)        |
| SER        | 0.009<br>(0.009)        | 0.009<br>(0.008)        | <b>0.236</b><br>(0.025) | 0.008<br>(0.008)        | 0.008<br>(0.008)        | <u>0.675</u><br>(0.008) | 0.010<br>(0.010)        | 0.008<br>(0.008)        | 0.008<br>(0.008)        | 0.009<br>(0.009)        | 0.008<br>(0.008)        | 0.008<br>(0.008)        |
| CED        | 0.009<br>(0.009)        | 0.009<br>(0.008)        | 0.079<br>(0.033)        | 0.008<br>(0.007)        | 0.008<br>(0.008)        | 0.008<br>(0.008)        | <u>0.835</u><br>(0.035) | 0.008<br>(0.008)        | 0.008<br>(0.008)        | 0.008<br>(0.008)        | 0.008<br>(0.008)        | 0.008<br>(0.008)        |
| PIJ        | 0.008<br>(0.008)        | 0.008<br>(0.008)        | <b>0.242</b><br>(0.026) | 0.007<br>(0.007)        | 0.007<br>(0.007)        | 0.007<br>(0.007)        | 0.008<br>(0.008)        | <u>0.677</u><br>(0.015) | 0.009<br>(0.009)        | 0.008<br>(0.008)        | 0.007<br>(0.007)        | 0.008<br>(0.007)        |
| IJU        | 0.008<br>(0.008)        | 0.008<br>(0.008)        | <b>0.212</b><br>(0.057) | 0.008<br>(0.008)        | 0.008<br>(0.008)        | 0.008<br>(0.008)        | 0.009<br>(0.008)        | 0.008<br>(0.008)        | <u>0.704</u><br>(0.052) | 0.008<br>(0.008)        | 0.008<br>(0.008)        | 0.008<br>(0.007)        |
| ANC        | 0.008<br>(0.007)        | 0.008<br>(0.008)        | 0.027<br>(0.015)        | 0.007<br>(0.007)        | 0.008<br>(0.008)        | 0.008<br>(0.008)        | 0.009<br>(0.008)        | 0.007<br>(0.007)        | 0.008<br>(0.008)        | <u>0.892</u><br>(0.024) | 0.007<br>(0.007)        | 0.008<br>(0.008)        |
| FRI        | 0.008<br>(0.008)        | 0.013<br>(0.012)        | 0.02<br>(0.015)         | 0.009<br>(0.009)        | 0.009<br>(0.009)        | 0.009<br>(0.009)        | 0.024<br>(0.019)        | 0.009<br>(0.009)        | 0.019<br>(0.020)        | 0.009<br>(0.009)        | <u>0.844</u><br>(0.040) | 0.022<br>(0.021)        |
| POR        | 0.008<br>(0.008)        | 0.01<br>(0.009)         | 0.01<br>(0.01)          | 0.008<br>(0.007)        | 0.008<br>(0.007)        | 0.008<br>(0.008)        | 0.010<br>(0.009)        | 0.009<br>(0.009)        | 0.012<br>(0.014)        | 0.009<br>(0.008)        | 0.041<br>(0.025)        | <u>0.864</u><br>(0.032) |

**Table S5.** Neutrality tests Fu's  $F$  and Tajima's  $D$  of the populations and regional groups of *D. caudatum* performed to measure population expansion and contraction. Values in bold are significant; N.A.: not applicable

| Region/Population | $F$           | $P$ -value | $D$    | $P$ -value |
|-------------------|---------------|------------|--------|------------|
| Andalusia         | 0.000         | N.A.       | 0.000  | 1          |
| CRM               | 0.000         | N.A.       | 0.000  | 1          |
| COQ               | 0.000         | N.A.       | 0.000  | 1          |
| Azores            | -1.625        | 0.093      | -0.393 | 0.383      |
| AGU               | 0.626         | 0.511      | 1.225  | 0.937      |
| CID               | 0.626         | 0.526      | 1.225  | 0.935      |
| FUR               | <b>-1.938</b> | 0.014      | -0.972 | 0.1        |
| SER               | -0.474        | 0.200      | 0.243  | 0.769      |
| Canary Islands    | 0.039         | 0.514      | 0.554  | 0.744      |
| ANC               | 0.000         | N.A.       | 0.000  | 1          |
| CED               | 0.626         | 0.513      | 1.225  | 0.930      |
| PIJ               | 1.687         | 0.761      | 1.459  | 0.952      |
| IJU               | <b>-1.648</b> | 0.047      | -0.175 | 0.439      |
| Madeira           | -1.587        | 0.057      | -0.279 | 0.381      |
| FRI               | 0.061         | 0.320      | -0.175 | 0.432      |
| POR               | <b>-1.648</b> | 0.047      | -0.175 | 0.432      |
